# Supplementary material for: Mediterranean Diet and White Blood Cell Count—A Randomized Controlled Trial
Source: MDPI journal article supplement (doi:10.3390/foods10061268), 2021-06-02
Supplement: s1 [file s1]

## SUPPLEMENTARY DATA

### SUPPLEMENTARY TABLES

**Supplementary Table S1.** Power analyses for all study determinations

|                            | Volunteers<br>(control<br>diet) | MedDiets combined vs. control diet   |                                              |                                        |       | MedDiet-EVOO vs. control diet    |                                          |                                        |       | MedDiet-Nuts vs. control diet    |                                          |                                        |       |
|----------------------------|---------------------------------|--------------------------------------|----------------------------------------------|----------------------------------------|-------|----------------------------------|------------------------------------------|----------------------------------------|-------|----------------------------------|------------------------------------------|----------------------------------------|-------|
|                            |                                 | Volunteers<br>(MedDiets<br>combined) | Cases<br>(control +<br>MedDiets<br>combined) | HR<br>detectable<br>with ≥80%<br>power |       | Volunteers<br>(MedDiet-<br>EVOO) | Cases<br>(control +<br>MedDiet-<br>EVOO) | HR<br>detectable<br>with ≥80%<br>power |       | Volunteers<br>(MedDiet-<br>Nuts) | Cases<br>(control +<br>MedDiet-<br>Nuts) | HR<br>detectable<br>with ≥80%<br>power |       |
|                            |                                 |                                      |                                              | <1                                     | >1    |                                  |                                          | <1                                     | >1    |                                  |                                          | <1                                     | >1    |
| Leukocytosis<br>onset      | 1,034                           | 2,156                                | 42                                           | ≤0.43                                  | ≥3.42 | 1,154                            | 30                                       | ≤0.33                                  | ≥3.20 | 1,002                            | 28                                       | ≤0.30                                  | ≥3.19 |
| Leukopenia<br>onset        | 948                             | 1,977                                | 113                                          | ≤0.59                                  | ≥1.90 | 1,055                            | 89                                       | ≤0.54                                  | ≥1.86 | 922                              | 72                                       | ≤0.50                                  | ≥1.90 |
| Severe<br>leukopenia onset | 1,034                           | 2,156                                | 23                                           | ≤0.32                                  | ≥8.67 | 1,154                            | 20                                       | ≤0.24                                  | ≥4.65 | 1,002                            | 16                                       | ≤0.17                                  | ≥5.43 |

*MedDiet-EVOO*: Mediterranean diet enriched with extra-virgin olive oil; *MedDiet-Nuts*: Mediterranean diet enriched with mixed nuts.

**Supplementary Table S2.** Comparison of study population with non-included PREDIMED participants.

|                                                                                                                                   | <b>Study<br/>population<br/>(n=4,192)</b> | <b>Non-included<br/>PREDIMED<br/>participants<br/>(n=3,255)</b> | <b>P-value</b> |
|-----------------------------------------------------------------------------------------------------------------------------------|-------------------------------------------|-----------------------------------------------------------------|----------------|
| Age (years), mean $\pm$ SD                                                                                                        | 67.1 $\pm$ 6.14                           | 66.9 $\pm$ 6.28                                                 | 0.275          |
| Female sex, n (%)                                                                                                                 | 2416 (57.6)                               | 1866 (57.3)                                                     | 0.921          |
| Diabetes, n (%)                                                                                                                   | 1949 (46.5)                               | 1683 (51.7)                                                     | <0.001         |
| Hypercholesterolemia, n (%)                                                                                                       | 3103 (74.0)                               | 2281 (70.1)                                                     | <0.001         |
| Hypertriglyceridemia, n (%)                                                                                                       | 1269 (30.3)                               | 866 (26.6)                                                      | <0.001         |
| Hypertension, n (%)                                                                                                               | 3512 (83.8)                               | 2651 (81.4)                                                     | 0.006          |
| Current smokers, n (%)                                                                                                            | 574 (13.7)                                | 473 (14.5)                                                      | 0.259          |
| Obese individuals, n (%)                                                                                                          | 2052 (49.0)                               | 1452 (44.6)                                                     | <0.001         |
| MedDiet adherence score, mean $\pm$ SD                                                                                            | 8.62 $\pm$ 1.96                           | 8.75 $\pm$ 1.81                                                 | 0.003          |
| Leisure-time physical activity<br>(metabolic equivalents of task·minute/d),<br>median (1 <sup>st</sup> -3 <sup>rd</sup> quartile) | 168 (56.2-315)                            | 186 (72.7-328)                                                  | <0.001         |

*MedDiet*: Mediterranean diet; *MedDiet-EVOO*: Mediterranean diet intervention enriched with extra-virgin olive oil; *MedDiet-Nuts*: Mediterranean diet intervention enriched with mixed nuts.

**Supplementary Table S3.** Evolution over time of white blood cell count in the PREDIMED Study groups

|                   | Baseline<br>(10 <sup>9</sup> cells/L,<br>mean ± SD) | 1 year<br>(10 <sup>9</sup> cells/L,<br>mean ± SD) | 2-3 years<br>(10 <sup>9</sup> cells/L,<br>mean ± SD) | 4-6 years<br>(10 <sup>9</sup> cells/L,<br>mean ± SD) | Time effect<br>(10 <sup>9</sup> cells/L·year,<br>[95% CI]) | Time*group effect<br>(10 <sup>9</sup> cells/L·year,<br>[95% CI], vs. control diet) |
|-------------------|-----------------------------------------------------|---------------------------------------------------|------------------------------------------------------|------------------------------------------------------|------------------------------------------------------------|------------------------------------------------------------------------------------|
| Control diet      | 6.69 ± 2.09                                         | 6.58 ± 1.81                                       | 6.60 ± 1.92                                          | 6.84 ± 2.17                                          | +0.026<br>[0.003 to 0.049]<br>( <i>P</i> -value= 0.023)    | Ref.                                                                               |
| MedDiets combined | 6.55 ± 1.81                                         | 6.52 ± 1.84                                       | 6.51 ± 1.66                                          | 6.68 ± 1.89                                          |                                                            | 0.012 [-0.015 to 0.039]<br>( <i>P</i> -value= 0.380)                               |
| MedDiet-EVOO      | 6.51 ± 1.74                                         | 6.50 ± 1.83                                       | 6.51 ± 1.71                                          | 6.72 ± 2.09                                          |                                                            | 0.023 [-0.007 to 0.053]<br>( <i>P</i> -value= 0.124)                               |
| MedDiet-Nuts      | 6.58 ± 1.88                                         | 6.53 ± 1.86                                       | 6.51 ± 1.59                                          | 6.63 ± 1.61                                          |                                                            | -0.002 [-0.033 to 0.029]<br>( <i>P</i> -value= 0.879)                              |

Time effects and between-group changes were estimated by repeated measurement mixed models adjusted for white blood cell count at baseline, age, sex, recruitment site, educational level, diabetes, hypercholesterolemia, hypertriglyceridemia, hypertension, smoking habit, leisure-time physical activity, body mass index, hemoglobin levels, alcohol consumption (baseline values, all), and two propensity scores that used 30 baseline variables to estimate the probability of assignment to each of the intervention groups.

*MedDiet-EVOO*: Mediterranean diet intervention enriched with virgin olive oil; *MedDiet-*

*Nuts*: Mediterranean diet intervention enriched with mixed nuts.

**Supplementary Table S4.** Associations of white blood cell count alterations at baseline with the risk of all-cause mortality stratified by intervention group and cumulative adherence to the Mediterranean diet.

|                                                                                                                   |                            | Leukocytosis                 |                   |                                | Leukopenia                   |                   |                                |
|-------------------------------------------------------------------------------------------------------------------|----------------------------|------------------------------|-------------------|--------------------------------|------------------------------|-------------------|--------------------------------|
| Association of white blood cell count alterations (at baseline) with the incidence of major cardiovascular events |                            |                              |                   |                                |                              |                   |                                |
|                                                                                                                   | Presence of the alteration | Cases/Total (incidence rate) | HR [95% CI]       | <i>P</i> -value                | Cases/Total (incidence rate) | HR [95% CI]       | <i>P</i> -value                |
|                                                                                                                   | No                         | 171/4,106 (4.16%)            | 1 (Ref.)          | -                              | 165/3,819 (4.32%)            | 1 (Ref.)          | -                              |
|                                                                                                                   | Yes                        | 8/86 (9.30%)                 | 1.52 [0.68; 3.38] | 0.308                          | 14/373 (3.75%)               | 1.01 [0.57; 1.77] | 0.978                          |
| Stratification in PREDIMED intervention groups                                                                    |                            |                              |                   |                                |                              |                   |                                |
|                                                                                                                   | Presence of the alteration | Cases/Total (incidence rate) | HR [95% CI]       | Interaction ( <i>P</i> -value) | Cases/Total (incidence rate) | HR [95% CI]       | Interaction ( <i>P</i> -value) |
| Control diet                                                                                                      | No                         | 55/1,395 (3.94%)             | 1 (Ref.)          |                                | 52/1,307 (3.98%)             | 1 (Ref.)          |                                |
|                                                                                                                   | Yes                        | 3/30 (10.0%)                 | 1.44 [0.30; 6.89] |                                | 6/118 (5.08%)                | 1.40 [0.56; 3.50] |                                |
| MedDiet groups                                                                                                    | No                         | 116/2,711 (4.28%)            | 1 (Ref.)          |                                | 113/2,512 (4.50%)            | 1 (Ref.)          |                                |
|                                                                                                                   | Yes                        | 5/56 (8.93%)                 | 1.49 [0.55; 4.04] | 0.985                          | 8/255 (3.14%)                | 0.73 [0.34; 1.54] | 0.281                          |
| Stratification in groups according to cumulative adherence to Mediterranean diet (below vs. above the median)     |                            |                              |                   |                                |                              |                   |                                |
|                                                                                                                   | Presence of the alteration | Cases/Total (incidence rate) | HR [95% CI]       | Interaction ( <i>P</i> -value) | Cases/Total (incidence rate) | HR [95% CI]       | Interaction ( <i>P</i> -value) |
| Below the median                                                                                                  | No                         | 97/2,074 (4.68%)             | 1 (Ref.)          |                                | 93/1,952 (4.76%)             | 1 (Ref.)          |                                |
|                                                                                                                   | Yes                        | 6/45 (13.3%)                 | 1.58 [0.64; 3.91] |                                | 10/167 (5.99%)               | 1.80 [0.92; 3.55] |                                |

|                  |     |                     |                      |       |                     |                      |       |
|------------------|-----|---------------------|----------------------|-------|---------------------|----------------------|-------|
| Above the median | No  | 72/2,022<br>(3.56%) | 1 (Ref.)             |       | 70/1,857<br>(3.77%) | 1 (Ref.)             |       |
|                  | Yes | 2/41<br>(4.88%)     | 1.01<br>[0.19; 5.42] | 0.237 | 4/206<br>(1.94%)    | 0.54<br>[0.19; 1.54] | 0.032 |

Hazard ratios were estimated by multivariable Cox proportional hazards regression models stratified by: sex, recruitment site, and educational level; and adjusted for: white blood cell counts, age, diabetes, hypercholesterolemia, hypertriglyceridemia, hypertension, smoking habit, leisure-time physical activity, body mass index, hemoglobin levels, and alcohol consumption (at baseline). Analyses stratified according to cumulative MedDiet adherence were further adjusted for PREDIMED intervention group. We used robust standard errors to account for intra-cluster correlations.

*HR*: hazard ratio; *MedDiet*: Mediterranean diet.

## SUPPLEMENTARY FIGURES

**Supplementary Figure S1.** Weighted Kaplan-Meier estimates of the cumulative incidence of leukocytosis (A), leukopenia (B), and severe leukopenia (C) in intervention groups.

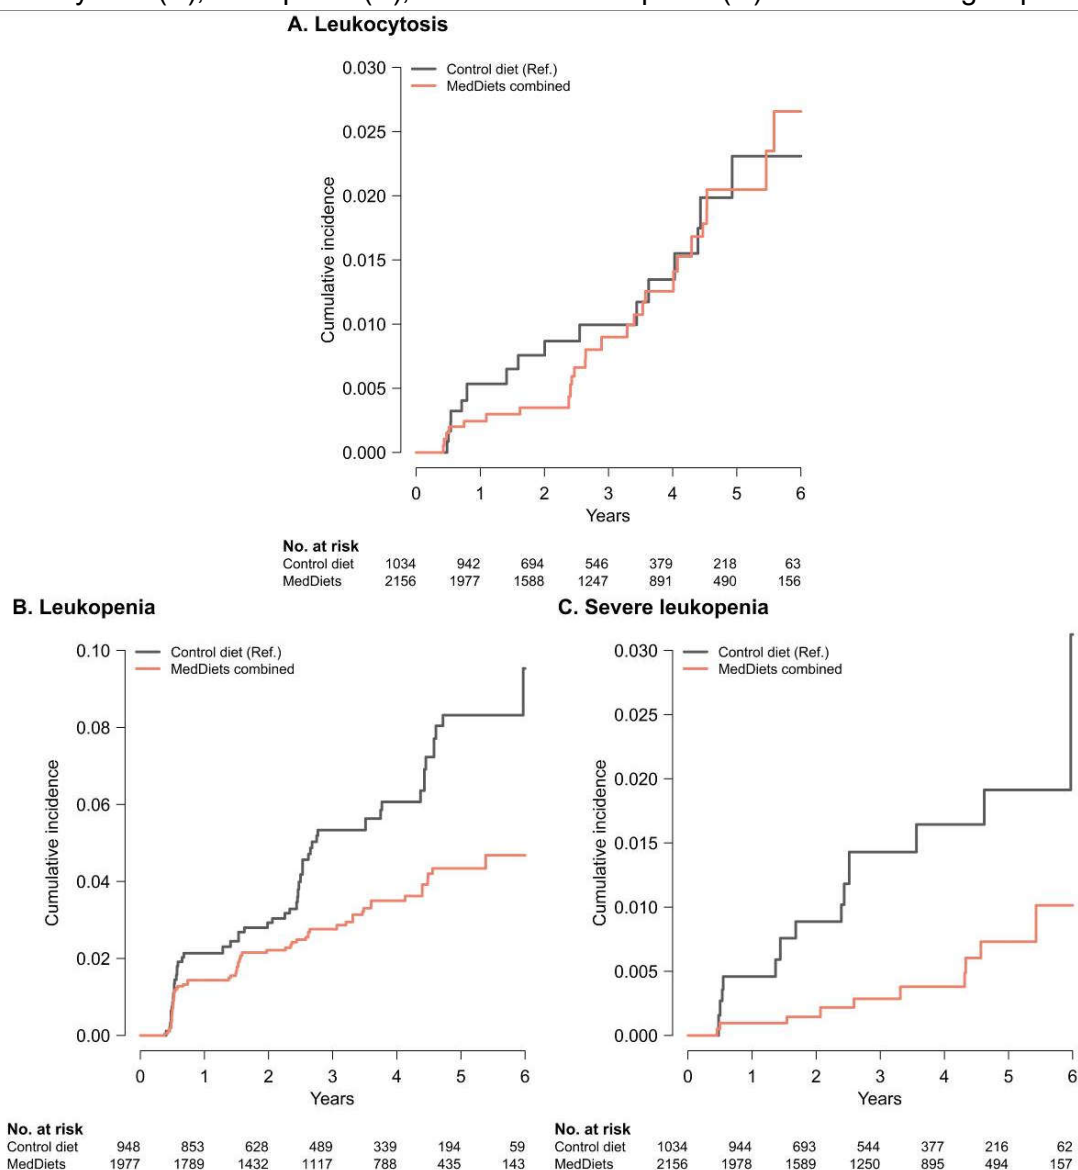

Kaplan-Meier curves weighted by inverse probability weighting using a propensity score model of assignment to intervention or control group based on: white blood cell counts at baseline, age, sex, recruitment site, educational level, diabetes, hypercholesterolemia, hypertriglyceridemia, hypertension, smoking habit, leisure-time physical activity, body mass index, hemoglobin levels, alcohol consumption (baseline values, all), and two propensity scores that used 30 baseline variables to estimate the probability of assignment to each of the intervention groups.

*MedDiet-EVOO*: Mediterranean diet enriched with extra-virgin olive oil; *MedDiet-Nuts*: Mediterranean diet enriched with mixed nuts.

## **Appendix.** List of PREDIMED study collaborators

Hospital Clinic, Institut d'Investigacions Biomèdiques August Pi i Sunyer, Barcelona, Spain: R. Estruch, M. Serra, A. Pérez-Heras, C. Viñas, R. Casas, L. de Santamaría, S. Romero, E. Sacanella, G. Chiva, P. Valderas, S. Arranz, J.M. Baena, M. García, M. Oller, J. Amat, I. Duaso, Y. García, C. Iglesias, C. Simón, L. Quinzavos, L. Parra, M. Liroz, J. Benavent, J. Clos, I. Pla, M. Amorós, M.T. Bonet, M.T. Martín, M.S. Sánchez, J. Altirriba, E. Manzano, A. Altés, M. Cofán, C. Valls-Pedret, A. Sala-Vila, M. Doménech, R. Gilibert, and N. Bargalló.

University of Navarra, Primary Care Centres, Pamplona, Spain: M.Á. Martínez-González, A. Sánchez-Tainta, B. Sanjulián, E. Toledo, M. Bes-Rastrollo, A. Martí, C. Razquin, P. Buil-Cosiales, M. Serrano-Martínez, J. Díez-Espino, A. García-Arellano, I. Zazpe, F.J. Basterra-Gortari, E.H. Martínez-Lapiscina, A. Gea, M. Garcia-Lopez, J.M. Nuñez-Córdoba, N. Ortuño, N. Berrade, V. Extremera-Urabayen, C. Arroyo-Azpa, L. García-Pérez, J. Villanueva-Tellería, F. Cortés-Ugalde, T. Sagredo-Arce, M<sup>a</sup> D. García de la Noceda-Montoy, M<sup>a</sup> D. Vigata-López, M<sup>a</sup> T. Arceiz-Campo, A. Urtasun-Samper, M<sup>a</sup> V. Gueto-Rubio, and B. Churio-Beraza.

University of Valencia, Valencia, Spain; Universitat Jaume I, Castellon, Spain; and Conselleria de Sanitat, Generalitat Valenciana: D. Corella, P. Carrasco, C. Ortega-Azorín, E.M. Asensio, R. Osma, R. Barragán, F. Francés, M. Guillén, J.I. González, C. Sáiz, O. Portolés, F.J. Giménez, O. Coltell (U. Jaume I), R. Fernández-Carrión, I. González-Monje, L. Quiles, V. Pascual, C. Riera, M.A. Pages, D. Godoy, A. Carratalá-Calvo, S. Sánchez-Navarro, and C. Valero-Barceló.

University Rovira i Virgili, Reus, Spain: J. Salas-Salvadó, M. Bulló, R. González, C. Molina, F. Márquez, N. Babio, M. Sorlí, J. García-Roselló, F. Martín, R. Tort, A. Isach, B. Costa, J.J. Cabré, J. Fernández-Ballart, N. Ibarrola, C. Alegret, P. Martínez, S. Millán, J.L. Piñol, J. Basora, and J.M. Hernández.

Institut Hospital del Mar d'Investigacions Mèdiques, Barcelona, Spain: M. Fitó, M.I. Covas, O. Castañer, S. Tello, J. Vila, H. Schröder, R. De la Torre, D. Muñoz-Aguayo, N. Molina, E. Maestre, A. Rovira, R. Elosua, and M. Farré.

University Hospital of Alava, Vitoria, Spain: F. Arós, I. Salaverría, T. del Hierro, J. Algorta, S. Francisco, A. Alonso-Gómez, J. San-Vicente, E. Sanz, I. Felipe, A. Alonso-Gómez, and A. Loma-Ororio.

University of Málaga, Málaga, Spain: E. Gómez-Gracia, R. Benítez-Pont, M. Bianchi-Alba, J. Fernández-Crehuet Navajas, J. Wärnberg, R. Gómez-Huelgas, J. Martínez-González, V. Velasco-García, J. de Diego-Salas, A. Baca-Ororio, J. Gil-Zarzosa, J.J. Sánchez-Luque, and E. Vargas-López.

Institute of Health Sciences, University of Balearic Islands, and Hospital Son Espases, Palma de Mallorca, Spain: M. Fiol, M. García-Valdúeza, M. Moñino, A. Proenza, R. Prieto, G. Frontera, M. Ginard, F. Fiol, A. Jover, and J. García.

Department of Family Medicine, Primary Care Division of Sevilla, Sevilla, Spain: J. Lapetra, M. Leal, E. Martínez, J.M. Santos, M. Ortega-Calvo, P. Román, F.J. García, P. Iglesias, Y. Corchado, E. Mayoral, and C. Lama.

University of Las Palmas de Gran Canaria, Las Palmas, Spain: L. Serra-Majem, J. Álvarez-Pérez, E. Díez-Benítez, I. Bautista-Castaño, I. Maldonado-Díaz, A. Sánchez-Villegas, F. Sarmiando-de la Fe, C. Simón-García, I. Falcón-Sanabria, B. Macías-Gutiérrez, and A.J. Santana-Santana.

Hospital Universitario de Bellvitge, Hospitalet de Llobregat, Barcelona, Spain: X. Pintó, E. de la Cruz, A. Galera, Y. Soler, F. Trias, I. Sarasa, E. Padres, R. Figueras, X. Solanich, R. Pujol and E. Corbella.

Clinical End Point Committee: F. Arós (chair), M. Aldamiz, A. Alonso-Gómez, J. Berjón, L. Forga, J. Gállego, M. A. García-Layana, A. Larrauri, J. Portu, J. Timiraus, and M. Serrano-Martínez.
